# Supplementary material
Source: PubMed Central journal article supplement (PMC3321351)
Supplement: NIHMS348088-supplement-03.pdf [file NIHMS348088-supplement-03.pdf]

Antibodies used:

| Antigen       | Company                 | Catalog#                   | Concentration | Species |
|---------------|-------------------------|----------------------------|---------------|---------|
| Sigma-1       | ours                    | (Ramachandran et. al 2007) | 1/400-1/700   | Rabbit  |
| ChAT          | Chemicon                | AB144P                     | 1/400         | Goat    |
| Kv2.1         | Antibodies Incorporated | 75-014                     | 1/300         | Mouse   |
| M2AChR        | Chemicon                | MAB367                     | 1/500         | Rat     |
| Synaptophysin | Chemicon                | MAB368                     | 1/1000        | Mouse   |
| SK2           | Chemicon                | AB5356                     | 1/500         | Rabbit  |
| INMT          | Weinshilboum Laboratory | (Thompson et. al 1999)     | 1/500         | Rabbit  |
